# Supplementary material
Source: PubMed Central journal article supplement (PMC4544707)
Supplement: NIHMS704218-supplement-supplemtal_figures_and_atables.pdf [file NIHMS704218-supplement-supplemtal_figures_and_atables.pdf]

**Supplementary Table 1.**

| <b>Supplementary Table 1. Prior and Current Treatment Characteristics</b>                                                                                                  |     |                                    |
|----------------------------------------------------------------------------------------------------------------------------------------------------------------------------|-----|------------------------------------|
| Characteristic                                                                                                                                                             | N   | Median (IQ <sup>€</sup> Range) / % |
| WBRT <sup>‡</sup> Dose (Gray)                                                                                                                                              | 262 | 35 (30-37.5)                       |
| WBRT <sup>‡</sup> Boost                                                                                                                                                    |     |                                    |
| No                                                                                                                                                                         | 256 | 87.4                               |
| Yes                                                                                                                                                                        | 37  | 12.6                               |
| Surgical Management                                                                                                                                                        |     |                                    |
| Gross Total Resection                                                                                                                                                      | 81  | 27.6                               |
| Biopsy Alone                                                                                                                                                               | 5   | 1.7                                |
| None                                                                                                                                                                       | 207 | 70.6                               |
| Treatment Planning MRI                                                                                                                                                     |     |                                    |
| 1.5T MRI <sup>†</sup>                                                                                                                                                      | 148 | 50.5                               |
| 3T MRI                                                                                                                                                                     | 142 | 48.5                               |
| CT and/or MRI                                                                                                                                                              | 3   | 1.0                                |
| Lowest Margin Dose (Gray)                                                                                                                                                  | 292 | 18 (16-20)                         |
| Abbreviations: T: Tesla, %: Percent, N: Number, <sup>‡</sup> WBRT: Whole Brain Radiotherapy, <sup>€</sup> : Interquartile Range, <sup>†</sup> : Magnetic Resonance Imaging |     |                                    |

**Supplementary Table 2.**

| <b>Supplementary Table 2. Outcomes in an Un-Matched Cohort</b>                                                                                 |                     |                                          |                    |                                          |
|------------------------------------------------------------------------------------------------------------------------------------------------|---------------------|------------------------------------------|--------------------|------------------------------------------|
|                                                                                                                                                | <b>Up Front SRS</b> |                                          | <b>Salvage SRS</b> |                                          |
| Characteristic                                                                                                                                 | N                   | Median<br>(IQ <sup>€</sup> Range) /<br>% | N                  | Median<br>(IQ <sup>€</sup> Range) /<br>% |
| Overall Survival                                                                                                                               | 448                 | 8.98 (7.9-10.3)                          | 293                | 7.0 (6.4-7.7)                            |
| Dead                                                                                                                                           | 411                 | 91.7                                     | 271                | 92.5                                     |
| Alive                                                                                                                                          | 37                  | 8.3                                      | 22                 | 7.5                                      |
| Neurologic Death                                                                                                                               |                     |                                          |                    |                                          |
| Yes                                                                                                                                            | 128                 | 31.5                                     | 139                | 47.4                                     |
| No                                                                                                                                             | 278                 | 68.5                                     | 154                | 52.6                                     |
| Abbreviations: T: Tesla, %: Percent, N: Number, ‡:<br>WBRT: Whole Brain Radiotherapy, €: Interquartile Range,<br>†: Magnetic Resonance Imaging |                     |                                          |                    |                                          |

Supplementary Figure 1. Calibration Plots at 6, 9 and 12 months

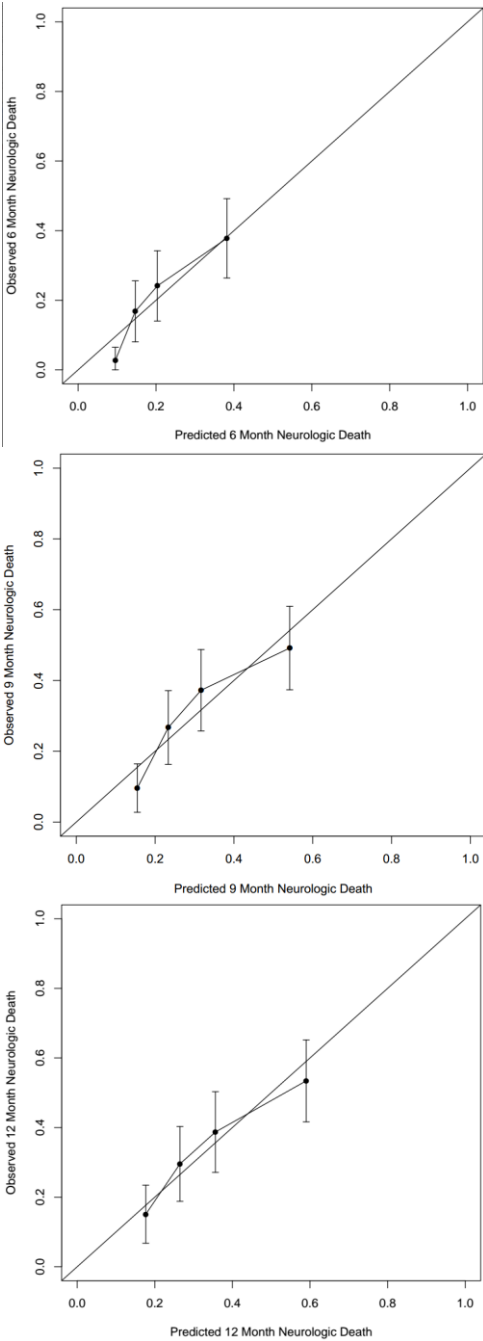

**Supplementary Figure 2.** Kaplan Meir Plot for Upfront SRS and Salvage SRS Patients

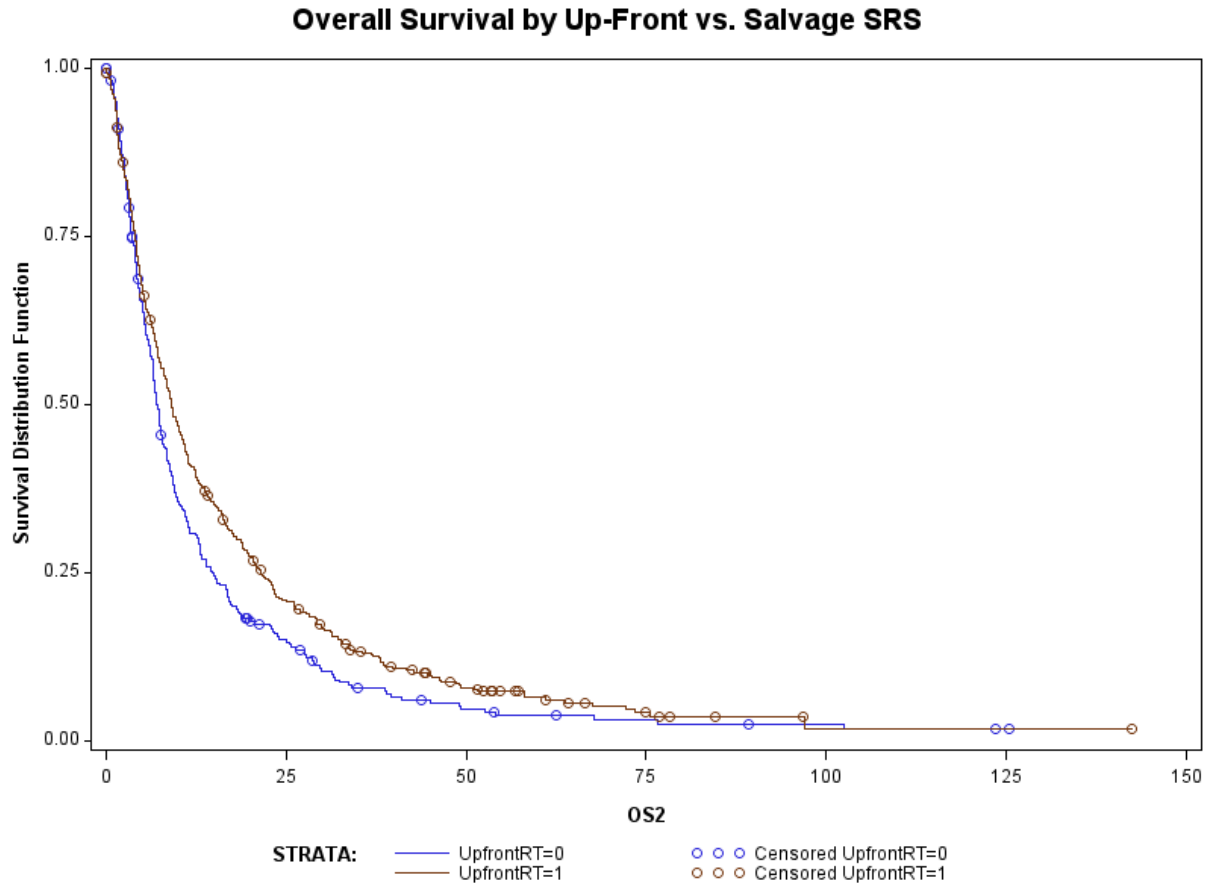

**Supplementary Figure 3.** Scatterplot Matrix and Regression Line of Observed DS-GPA Predicted Survival vs. Observed Overall Survival

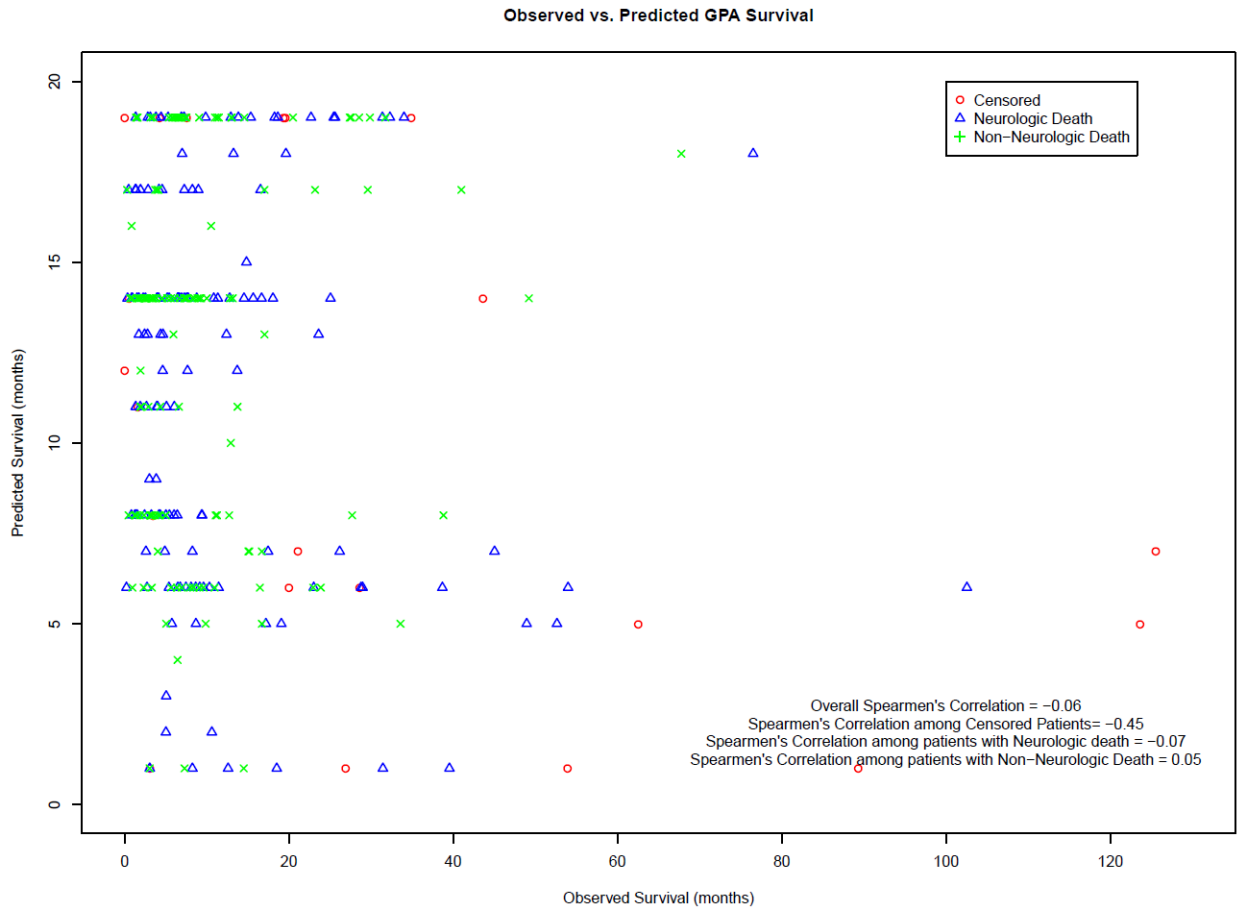

**Supplementary Figure 4.** Kaplan Meier Estimate vs. Cumulative Incidence of Neurologic and Non-Neurologic Death according to presence of brainstem location metastasis

## Methods

### - Kaplan Meier Estimate vs. Cumulative Incidences

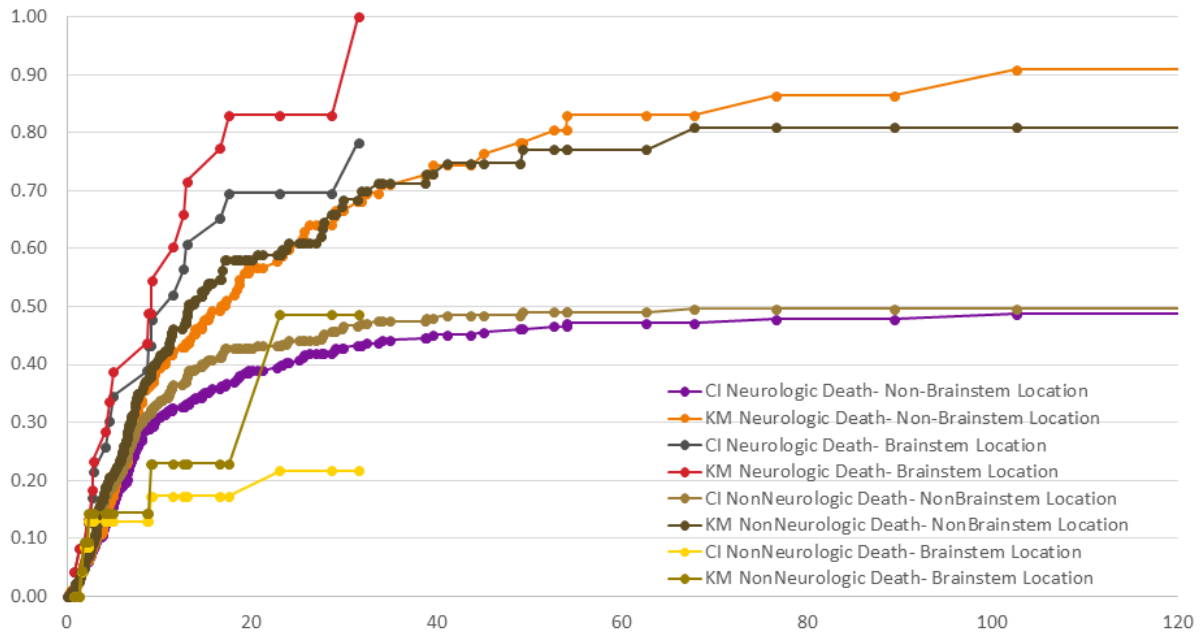

**Supplementary Table 3.** Univariate Cox Proportional Hazards Analysis for Non- and CNS Death from the Date of GKRS

| Parameter                                      | DF | Time to Non-CNS Death From Date of GKRS |                |            |              |          |          |           | Time to CNS Death From Date of GKRS |                |            |              |          |          |           |
|------------------------------------------------|----|-----------------------------------------|----------------|------------|--------------|----------|----------|-----------|-------------------------------------|----------------|------------|--------------|----------|----------|-----------|
|                                                |    | Parameter Estimate                      | Standard Error | Chi-Square | Hazard Ratio | Upper CI | Lower CI | P > ChiSq | Parameter Estimate                  | Standard Error | Chi-Square | Hazard Ratio | Upper CI | Lower CI | P > ChiSq |
| <b>Time to Non-CNS Death From Date of GKRS</b> |    |                                         |                |            |              |          |          |           |                                     |                |            |              |          |          |           |
| Age (Cont #)                                   | 1  | 0.02608                                 | 0.00562        | 21.9503    | 1.026        | 1.015    | 1.038    | <.0001    | 0.02284                             | 0.00873        | 6.8509     | 1.023        | 1.006    | 1.041    | <.0001    |
| Gender                                         |    |                                         |                |            |              |          |          |           |                                     |                |            |              |          |          |           |
| Female (F vs. M)                               | 1  | -0.09791                                | 0.12976        | 0.5693     | 0.907        | 0.703    | 1.169    | 0.4505    | -0.00945                            | 0.18042        | 0.0027     | 0.991        | 0.696    | 1.411    | 0.9582    |
| Primary                                        | 1  | 0.35377                                 | 0.16109        | 4.8231     | 1.424        | 1.953    | 17.468   | 0.0293    | 0.14548                             | 0.21683        | 0.4501     | 1.157        | 0.756    | 1.769    | 0.5023    |
| Primary (Esophagus vs. Breast)                 | 1  | 0.01418                                 | 0.72164        | 0.0004     | 1.014        | 4.173    | 24.486   | 0.9843    | -0.14602                            | 1.01781        | 0.0206     | 0.864        | 0.118    | 6.353    | 0.8859    |
| Primary (Melanoma vs. Breast)                  | 1  | 0.34382                                 | 0.24768        | 1.9269     | 1.41         | 2.292    | 30.726   | 0.1651    | 0.63155                             | 0.29815        | 4.487      | 1.881        | 1.048    | 3.373    | 0.0342    |
| Primary (Colorectal vs. Breast)                | 1  | 0.63995                                 | 0.43393        | 2.175      | 1.896        | 4.439    | 25.415   | 0.1403    | 1.19216                             | 0.48822        | 5.9626     | 3.294        | 1.265    | 8.577    | 0.0146    |
| Primary (GU vs. Breast)                        | 1  | -0.06375                                | 0.4032         | 0.025      | 0.938        | 2.068    | 40.215   | 0.8744    | 0.13559                             | 0.48333        | 0.0787     | 1.145        | 0.444    | 2.953    | 0.7791    |
| Primary (GYN vs. Breast)                       | 1  | -0.17295                                | 0.46881        | 0.0576     | 0.894        | 2.24     | 19.219   | 0.8103    | 0.19975                             | 0.53285        | 0.1406     | 1.221        | 0.43     | 3.469    | 0.7077    |
| Primary (Unk vs. Breast)                       | 1  | -1.44414                                | 0.72259        | 3.9942     | 0.236        | 0.973    | 19.621   | 0.0457    | -14.01402                           | 463.80764      | 0.0009     | 0            | 0        | 0        | 0.9759    |
| RPA                                            |    |                                         |                |            |              |          |          |           |                                     |                |            |              |          |          |           |
| RPA (2 vs. 1)                                  | 1  | -0.39209                                | 0.41787        | 0.8804     | 0.676        | 0.298    | 1.533    | 0.3481    | 0.86546                             | 0.50903        | 2.8907     | 2.376        | 0.876    | 6.444    | 0.0091    |
| RPA (3 vs. 1)                                  | 1  | 0.22527                                 | 0.20765        | 1.1769     | 1.253        | 0.834    | 1.882    | 0.278     | 1.60805                             | 0.67516        | 5.6726     | 4.993        | 1.329    | 18.75    | 0.0172    |
| (Continuous #)                                 | 1  | 0.02875                                 | 0.01972        | 2.1255     | 1.029        | 0.99     | 1.07     | 0.1449    | 0.07763                             | 0.02442        | 10.107     | 1.081        | 1.03     | 1.134    | 0.0015    |
| Postfossa (Yes vs. No)                         | 1  | 0.02158                                 | 0.04246        | 0.2582     | 1.022        | 0.94     | 1.11     | 0.6113    | 0.01887                             | 0.06992        | 0.036      | 1.019        | 0.904    | 1.148    | 0.7567    |
| BrainStem (Yes vs. No)                         | 1  | 0.04377                                 | 0.22851        | 0.0367     | 1.045        | 0.665    | 1.635    | 0.8481    | 0.48724                             | 0.28789        | 3.3081     | 1.628        | 0.963    | 2.752    | 0.06889   |
| Pineal (Yes v. No)                             | 1  | -0.65087                                | 1.00305        | 0.4211     | 0.522        | 0.073    | 3.725    | 0.5164    | -0.06764                            | 1.0047         | 0.0045     | 0.935        | 0.13     | 6.696    | 0.0463    |
| DomTemplate (Yes v. No)                        | 1  | 0.03745                                 | 0.19763        | 0.0359     | 1.038        | 0.705    | 1.529    | 0.8497    | 0.03997                             | 0.27446        | 0.0212     | 1.041        | 0.608    | 1.782    | 0.8842    |
| GKRS to Cavity (Yes v. No)                     | 1  | -0.10135                                | 0.2189         | 0.2144     | 0.904        | 0.588    | 1.388    | 0.6434    | 0.25059                             | 0.2599         | 0.9296     | 1.285        | 0.772    | 2.138    | 0.335     |
| None v. GTR                                    | 1  | 0.12307                                 | 0.14305        | 0.7402     | 1.131        | 0.854    | 1.487    | 0.3896    | -0.02774                            | 0.18979        | 0.0214     | 0.973        | 0.671    | 1.411    | 0.8838    |
| Prior Surgery                                  |    |                                         |                |            |              |          |          |           |                                     |                |            |              |          |          |           |
| Open Biopsy vs. GTR                            | 1  | 0.4096                                  | 1.00927        | 0.1647     | 1.566        | 0.208    | 10.889   | 0.6849    | 1.10349                             | 1.01723        | 1.0344     | 2.814        | 0.383    | 20.66    | 0.3091    |
| PriorSRS                                       |    |                                         |                |            |              |          |          |           |                                     |                |            |              |          |          |           |
| LowMarginDose                                  |    |                                         |                |            |              |          |          |           |                                     |                |            |              |          |          |           |
| (GY)                                           | 1  | -0.58682                                | 0.18386        | 10.1665    | 0.556        | 0.388    | 0.787    | 0.6304    | -0.71313                            | 0.22566        | 7.784      | 0.49         | 0.287    | 0.809    | 0.0055    |
| Progression vs. Stable/NE D                    | 1  | -0.05573                                | 0.02171        | 6.5877     | 0.946        | 0.906    | 0.987    | 0.0313    | -0.1026                             | 0.02965        | 11.965     | 0.902        | 0.882    | 0.957    | 0.0005    |
| KPS                                            | 1  | 0.28364                                 | 0.1317         | 4.6395     | 1.328        | 1.028    | 1.719    | 0.0313    | -0.06204                            | 0.19138        | 0.1051     | 0.94         | 0.646    | 1.368    | 0.7458    |
| KPS                                            | 1  | -0.03413                                | 0.00621        | 30.166     | 0.966        | 0.955    | 0.978    | <.0001    | -0.03436                            | 0.00884        | 15.128     | 0.966        | 0.95     | 0.983    | 0.0001    |
